# Supplementary material for: Optimizing Extraction Conditions of Free and Bound Phenolic Compounds from Rice By-Products and Their Antioxidant Effects
Source: MDPI journal article supplement (doi:10.3390/foods7060093), 2018-06-13
Supplement: s1 [file s1]

*Supplementary Materials:* Supplementary materials are available online.

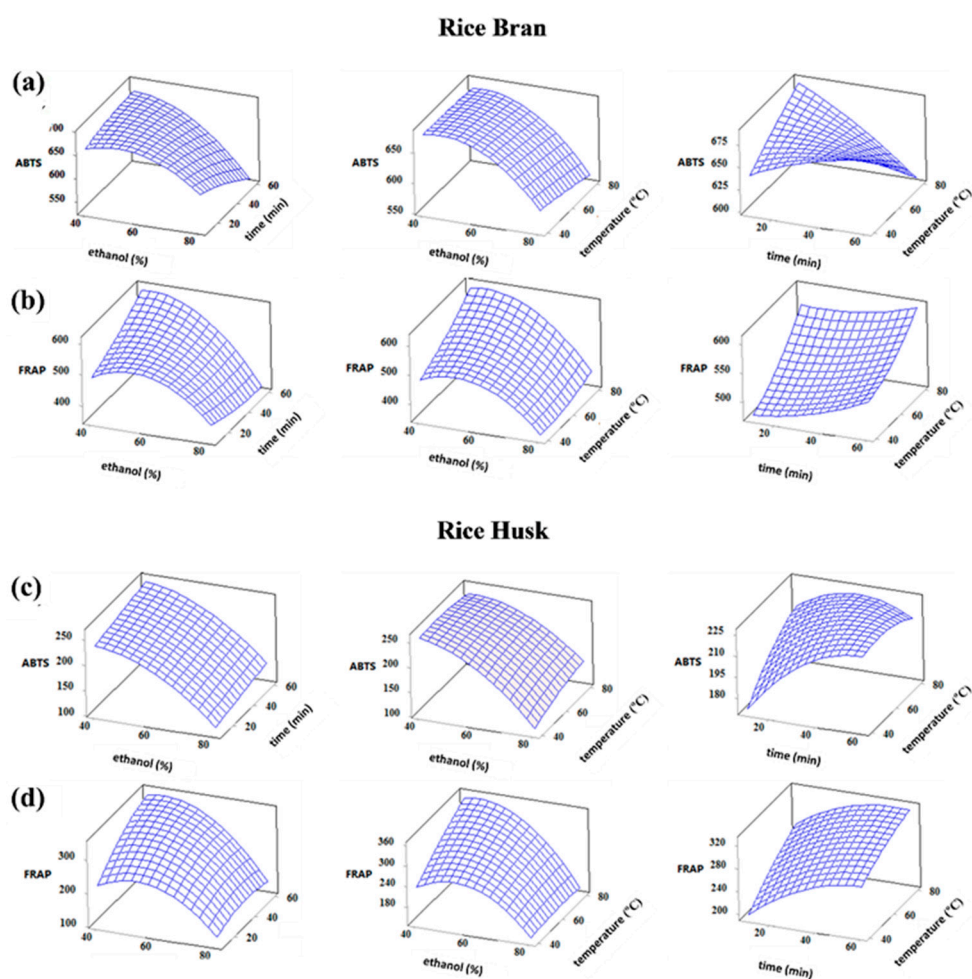

**Figure 1s.** Effect of ethanol concentration, time and temperature extraction on ABTS radical scavenging activity (ABTS, mg TE/100 g) of free phenolics from rice bran (a) and rice husk (c) fractions and ferric reducing antioxidant power (FRAP, mg TE/100 g) of free phenolics from rice bran (b) and rice husk (d) fractions.

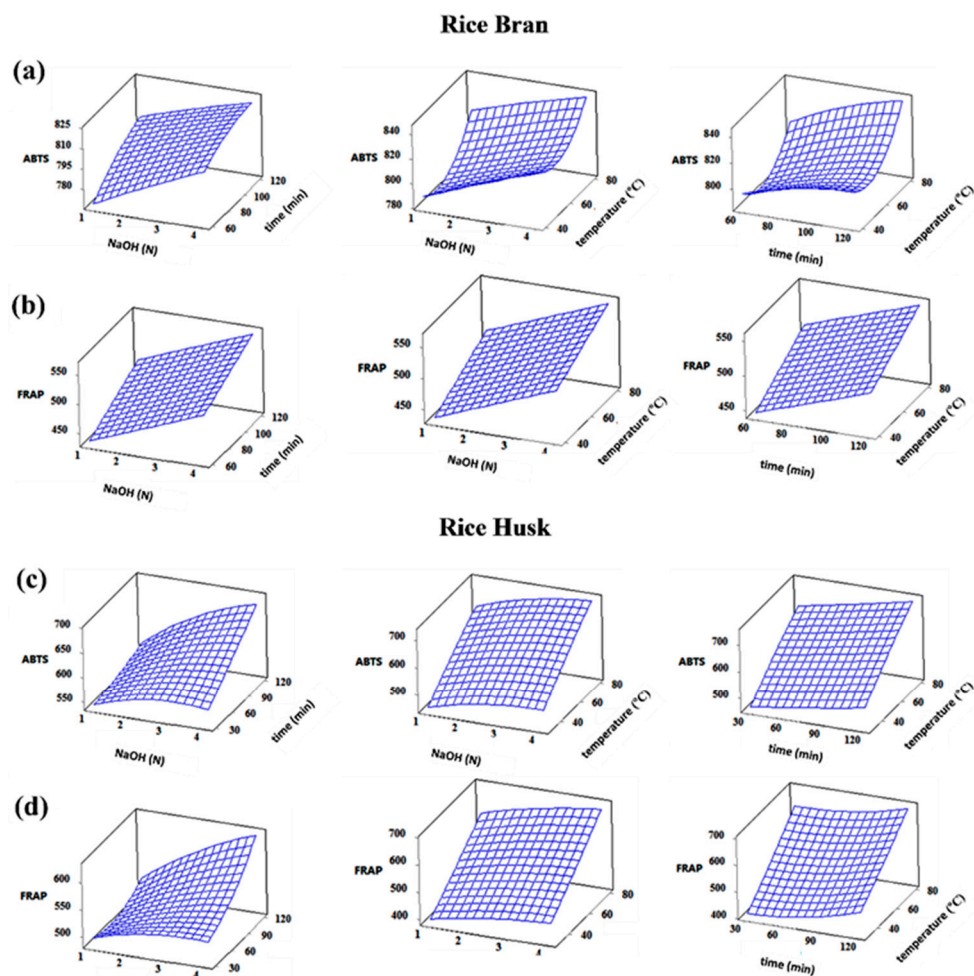

**Figure 2s.** Effect of NaOH concentration, time and temperature hydrolysis on ABTS radical scavenging activity (ABTS, mg TE/100 g) of bound phenolics from rice bran (a) and rice husk (c) fractions and ferric reducing antioxidant power (FRAP, mg TE/100 g) of bound phenolics from rice bran (b) and rice husk (d) fractions.
